# Supplementary material for: Measuring pathway database coverage of the phosphoproteome
Source: PeerJ journal article supplement (doi:10.7717/peerj.11298), 2021-05-25
Supplement: Supplemental_Figure_S5.pdf [file Supplemental_Figure_S5.pdf]

A)

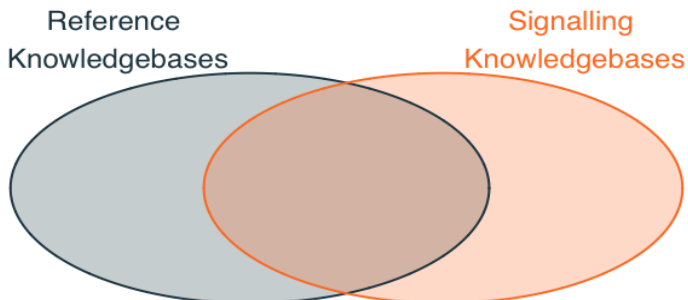

B)

|                                              | HPRD<br>(8047) | BioGRID<br>(18449) | Reactome<br>(10752) | KEGG<br>(7736) | WikiPathways<br>(7090) | PhosphoSitePlus<br>(2749) | SIGNOR<br>(5297) |
|----------------------------------------------|----------------|--------------------|---------------------|----------------|------------------------|---------------------------|------------------|
| qPhos<br>(15871)                             | 8936           | 1850               | 7047                | 9477           | 9859                   | 13231                     | 11193            |
| IMEX<br>(20794)                              | 12967          | 4618               | 11069               | 13807          | 14085                  | 18072                     | 15637            |
| GO Protein<br>Kinase Activity<br>(563)       | 177            | 29                 | 196                 | 219            | 175                    | 149                       | 114              |
| GO Signalling<br>(6643)                      | 2991           | 980                | 1829                | 2840           | 3005                   | 5015                      | 3567             |
| UniProt keyword:<br>PhosphoProtein<br>(8224) | 3630           | 425                | 3127                | 4542           | 4358                   | 5842                      | 4849             |

C)

|                                              | HPRD<br>(8047) | BioGRID<br>(18449) | Reactome<br>(10752) | KEGG<br>(7736) | WikiPathways<br>(7090) | PhosphoSitePlus<br>(2749) | SIGNOR<br>(5297) |
|----------------------------------------------|----------------|--------------------|---------------------|----------------|------------------------|---------------------------|------------------|
| qPhos<br>(15871)                             | 1112           | 4428               | 1928                | 1342           | 1078                   | 109                       | 619              |
| IMEX<br>(20794)                              | 220            | 2273               | 1027                | 749            | 381                    | 27                        | 140              |
| GO Protein<br>Kinase Activity<br>(563)       | 7661           | 17915              | 10385               | 7392           | 6702                   | 2335                      | 4848             |
| GO Signalling<br>(6643)                      | 4395           | 12786              | 5938                | 3933           | 3452                   | 1121                      | 2221             |
| UniProt keyword:<br>PhosphoProtein<br>(8224) | 3453           | 10650              | 5655                | 4054           | 3224                   | 367                       | 1922             |
