# Supplementary material for: Measuring pathway database coverage of the phosphoproteome
Source: PeerJ journal article supplement (doi:10.7717/peerj.11298), 2021-05-25
Supplement: Supplemental_Figure_S7.pdf [file Supplemental_Figure_S7.pdf]

A)

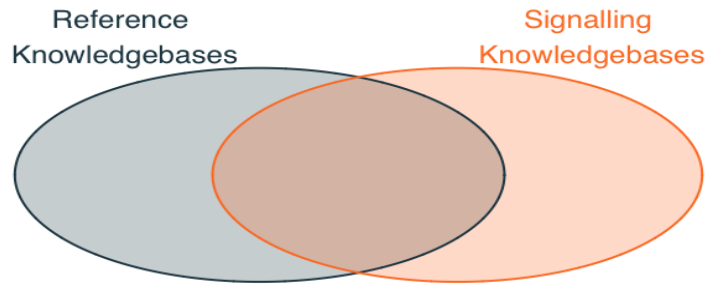

B)

|                    | HPRD<br>(31389) | PhosphoSitePlus<br>(8688) | BioGRID<br>(4833) | Reactome<br>(1608) | SIGNOR<br>(4923) |
|--------------------|-----------------|---------------------------|-------------------|--------------------|------------------|
| QPhos<br>(191813)  | 166368          | 187338                    | 188101            | 191096             | 189164           |
| UniProt<br>(40139) | 26528           | 36062                     | 37626             | 39232              | 37156            |

C)

|                    | HPRD<br>(31389) | PhosphoSitePlus<br>(8688) | BioGRID<br>(4833) | Reactome<br>(1608) | SIGNOR<br>(4923) |
|--------------------|-----------------|---------------------------|-------------------|--------------------|------------------|
| QPhos<br>(191813)  | 5944            | 4213                      | 1121              | 891                | 2274             |
| UniProt<br>(40139) | 17788           | 4621                      | 2330              | 711                | 1950             |
