# Supplementary material for: Measuring pathway database coverage of the phosphoproteome
Source: PeerJ journal article supplement (doi:10.7717/peerj.11298), 2021-05-25

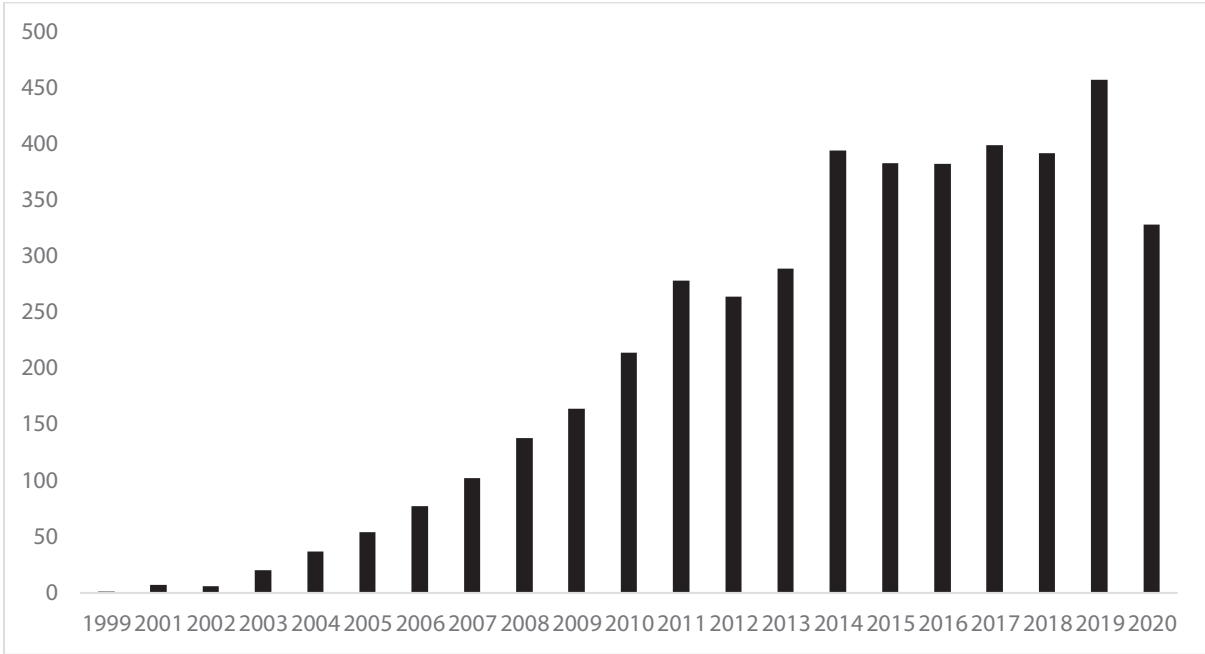

Supplement: Supplemental_Figure_S8.pdf [file Supplemental_Figure_S8.pdf]
